# Supplementary material for: Trace element mobility and transfer to vegetation within the Ethiopian Rift Valley lake areas
Source: Royal Society of Chemistry journal article supplement (doi:10.1039/c2em30271c), 2012-01-01
Supplement: c2em30271c.pdf [file c2em30271c.pdf]

Supplementary information:

Table showing detection limits of the ICP-MS (mg/kg) for the six step sequential extraction procedure. For each sequential extraction step six reagent blanks were used to determine the limit of detection of the instrument, expressed as three times the standard deviation of the corresponding blanks.

| Fractions                     | Cr    | Co     | Ni     | Cu    | Zn    | As     | Se     | Mo     | Cd     | Pb     | Mn    |
|-------------------------------|-------|--------|--------|-------|-------|--------|--------|--------|--------|--------|-------|
| WS                            | 0.009 | 6E-05  | 0.004  | 0.007 | 0.003 | 9E-05  | 0.0009 | 0.002  | 0.002  | 0.0005 | 0.004 |
| AA7                           | 0.04  | 8E-05  | 0.002  | 0.04  | 0.02  | 0.0005 | 0.01   | 0.002  | 0.0002 | 0.006  | 0.006 |
| AA5                           | 0.02  | 0.0001 | 0.0005 | 0.02  | 0.007 | 0.0003 | 0.01   | 0.0003 | 0.0003 | 0.003  | 0.005 |
| HA3                           | 0.002 | 0.002  | 0.001  | 0.01  | 0.009 | 0.001  | 0.007  | 0.001  | 0.0001 | 0.002  | 0.03  |
| H <sub>2</sub> O <sub>2</sub> | 0.03  | 0.0003 | 0.02   | 0.02  | 0.01  | 0.0009 | 0.01   | 0.02   | 0.0003 | 0.001  | 0.01  |
| HNO <sub>3</sub>              | 0.005 | 0.002  | 0.002  | 0.002 | 0.03  | 0.006  | 0.02   | 0.003  | 0.001  | 0.003  | 0.1   |

where abbreviations for fractions were represented by extraction reagent of each step: **WS**- water soluble, **AA7**- ammonium acetate at pH 7, **AA5**- ammonium acetate at pH 5, **HA**- Hydroxyl amine, **H<sub>2</sub>O<sub>2</sub>**- hydrogen peroxide and **HNO<sub>3</sub>**- 7M nitric acid.
